# Supplementary material
Source: HighWire-hosted journal article supplement (https://bjsm.bmj.com/content/53/21/1333)
Supplement: inline-supplementary-material-4 [file inline-supplementary-material-4.pdf]

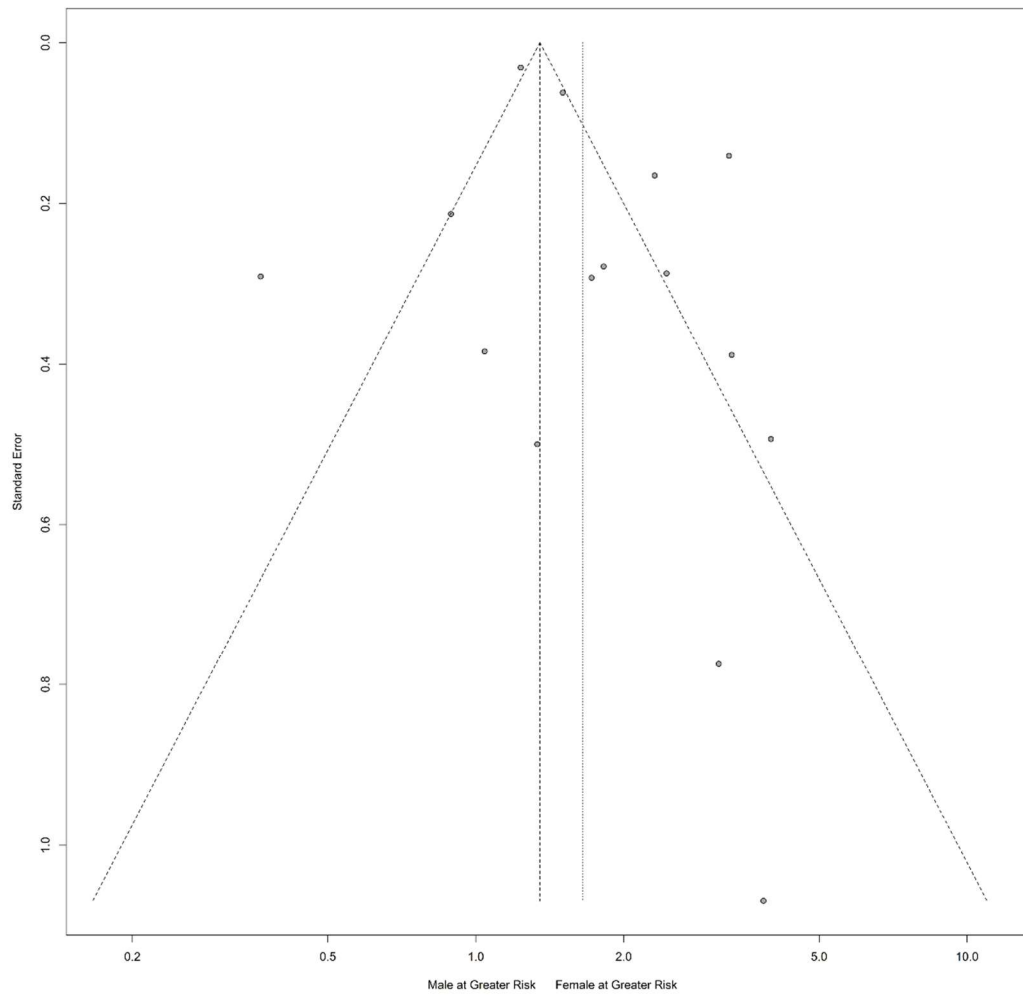

Supplementary File 4. Funnel plot to assess publication bias in studies comparing incidence rate of ACL injury in female and male football players.
